# Supplementary material for: Bio-Catalytic Synthesis of Quercetin-3-Oleate
Source: Preprints.org preprint supplement (doi:10.20944/preprints201806.0454.v1), 2018-06-27

## Bio-catalytic synthesis of Quercetin-3-oleate

Gabriele Carullo <sup>1</sup> and Francesca Aiello <sup>1,\*</sup>

<sup>1</sup> Department of Pharmacy, Health and Nutritional Sciences; University of Calabria, Edificio Polifunzionale, 87036, Arcavacata – Rende (CS), Italy. E-mail [gabriele.carullo@unical.it](mailto:gabriele.carullo@unical.it)

\* Correspondence: [francesca.aiello@unical.it](mailto:francesca.aiello@unical.it); Tel.: +39-0984-493154

### Purity by absolute qNMR

The purity was calculated using IC Method by Maleic acid Standard for quantitative NMR, TraceCERT®. The NMR tube was prepared adding to 0.180 mL of compound **2** Sample (5mg/mL) a solution of Maleic acid 0.095 mL (5mg/mL) as Internal Calibrant. Only the integral values of quercetin were considered significant, considering that the signals related to the oleic fragment overlapped with the DMSO.

$m_s = 0.0009$   $m_{IC} = 0.000475$   $P_{IC} = \text{Standard for quantitative NMR } 99.99\%$ ;  $Int_t = 5.87$ ,  $n_t = 1$ ;  $Int_{IC} = 1.09$ ,  $n_{IC} = 2$ ;  $MW_t = 566.6818$ ,

$MW_{IC} = 116.0722$

$P [\%] = (n_{IC} \cdot Int_t \cdot MW_t \cdot m_{IC} / n_t \cdot Int_{IC} \cdot MW_{IC} \cdot m_t) \cdot P_{IC} = 94.73\%$

# <sup>1</sup>H-NMR for qNMR calculation

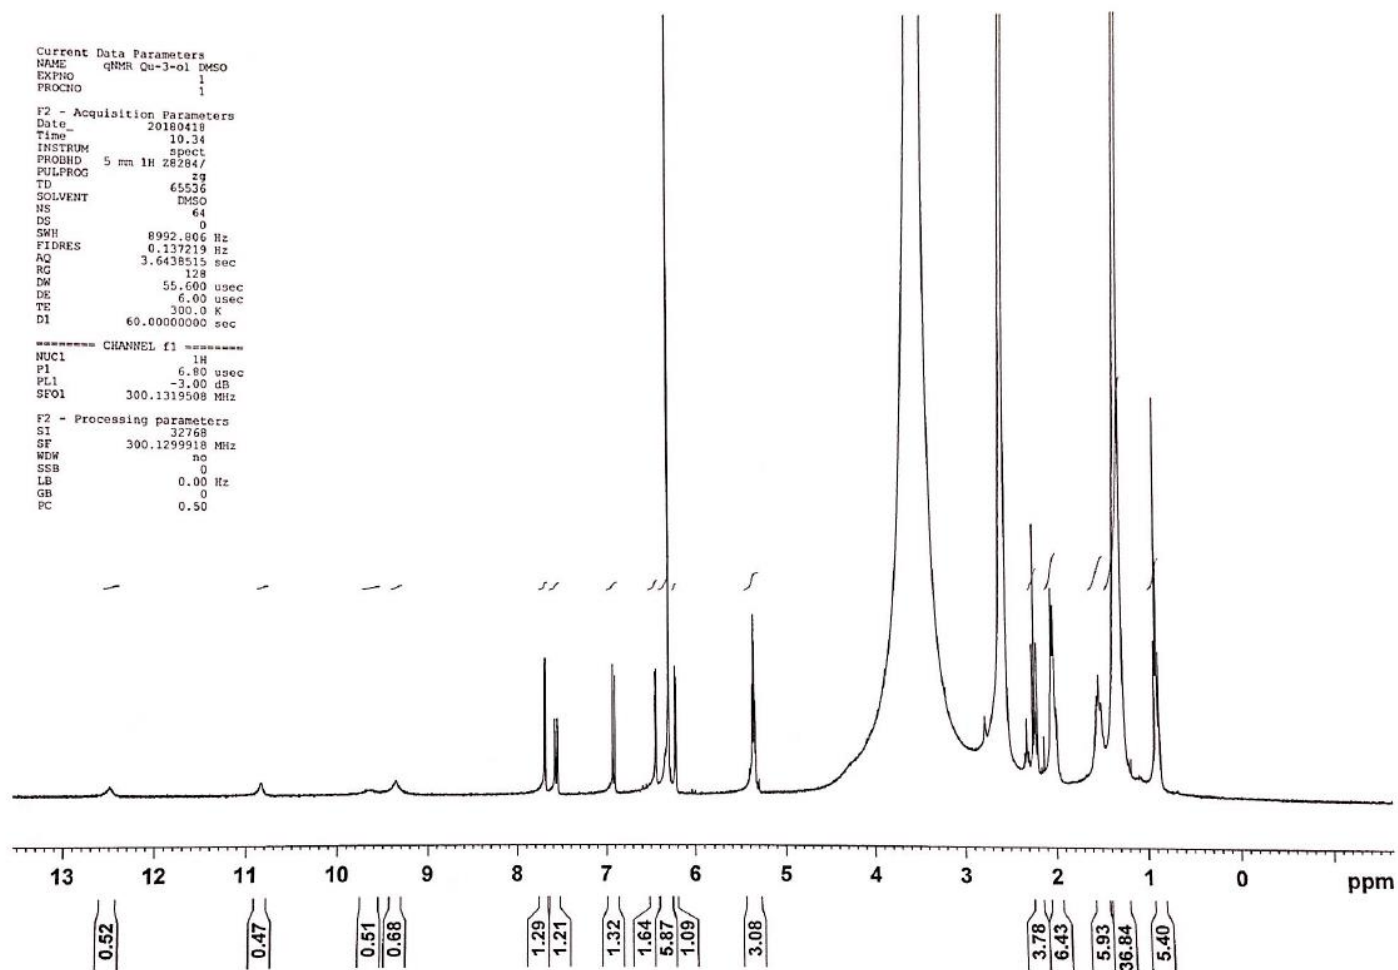

# <sup>13</sup>C NMR of compound 2

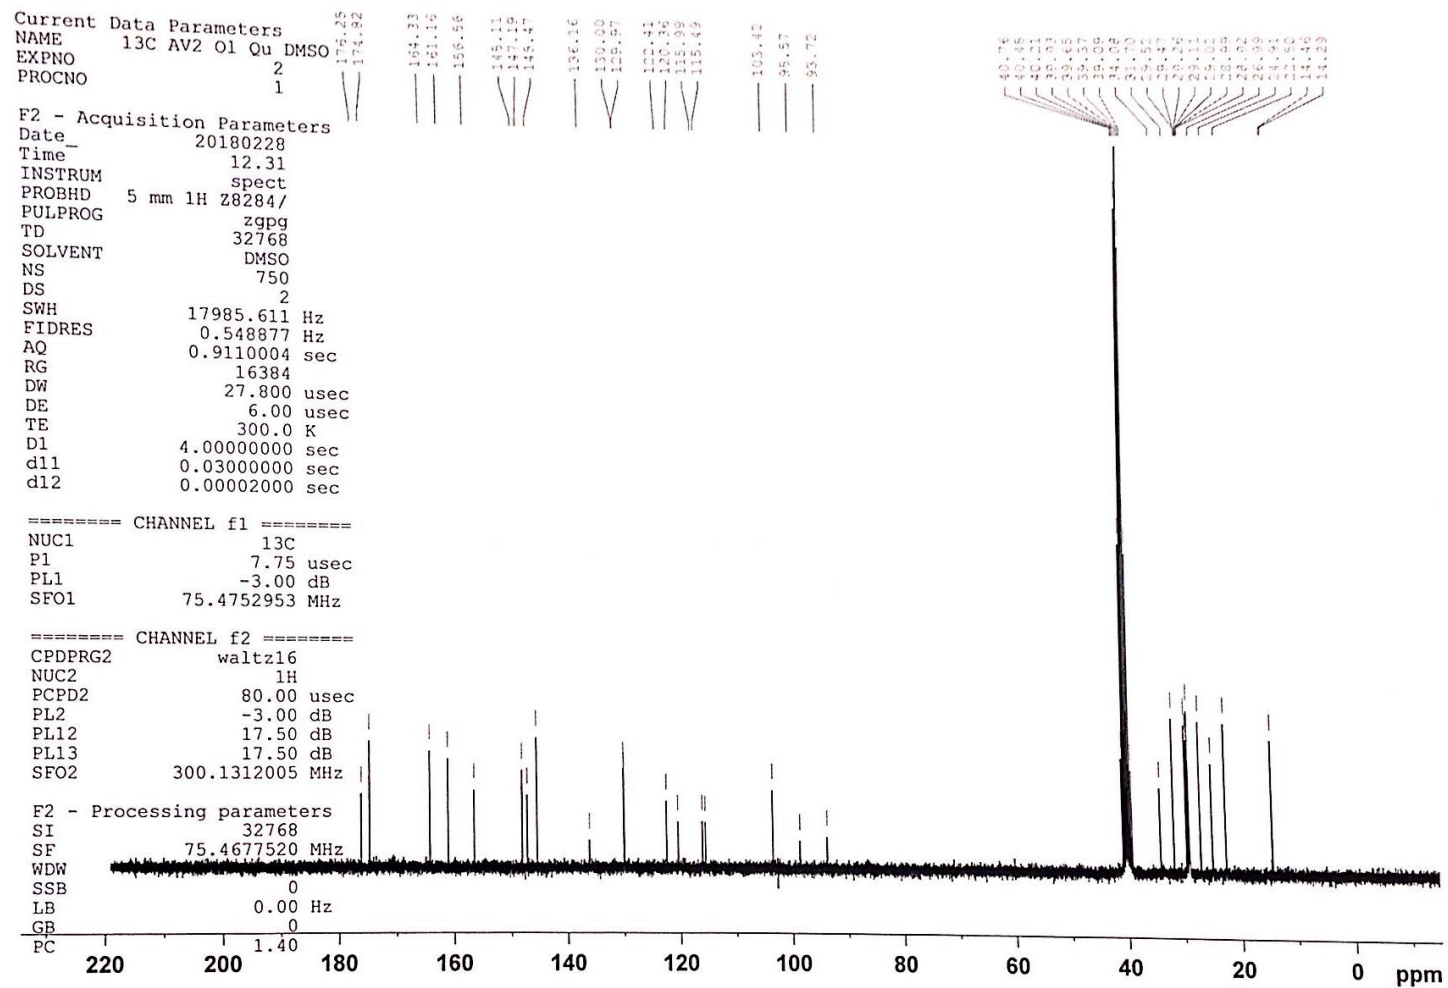

## IR spectrum

PerkinElmer Spectrum Versione 10.4.00  
martedì 26 giugno 2018 13.06

### Dettagli Report

Posizione Report

Autore Report

Data Report

C:\pel\_data\AIELLO\Campioni 1\_14.pdf

AIELLO FRANCESCA

martedì 26 giugno 2018 13.06

### Grafico Spettro

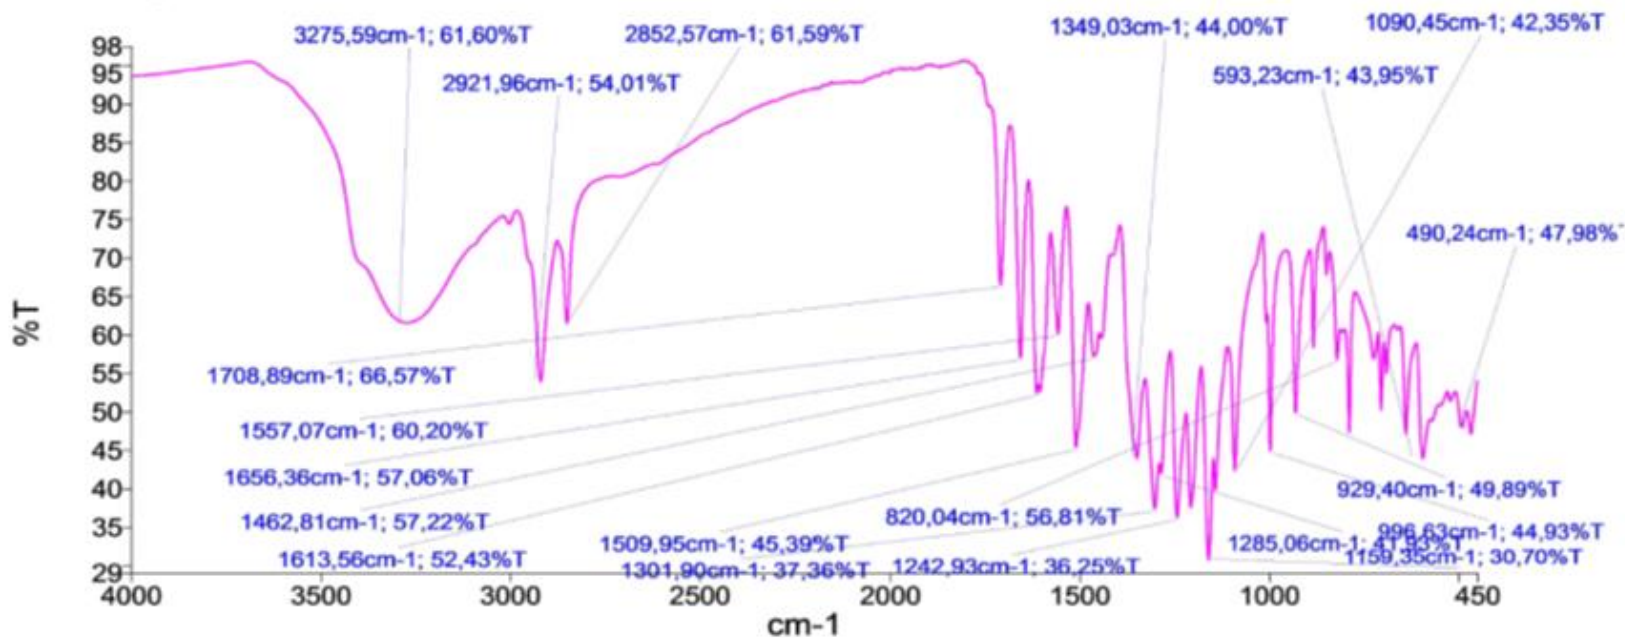

Supplement: Supplementary file 1 [file supplementary]
